# Supplementary material for: The Adjustment of Membrane Lipid Metabolism Pathways in Maize Roots Under Saline–Alkaline Stress
Source: Front Plant Sci. 2021 Mar 15;12:635327. doi: 10.3389/fpls.2021.635327 (PMC8006331; doi:10.3389/fpls.2021.635327)
Supplement: Supplementary Table 4 — The differentially expressed lipid-related transporters and transcriptional factors in maize roots under NaHCO3 stress (100 mmol). [file Table_4.XLSX]

## Sheet: Sheet1
Table S4.The Differentially Expressed Lipid-related Transporters and Transcriptional Factors in Maize Roots under NaHCO3 Stress.
Name Abbreviations	Maize ID	Putative Function	Log2 Fold Change (24H vs 0H）	Log2 Fold Change (72H vs 0H）	Arabidopsis ID
Transporters
TGD1	GRMZM2G170516	Trigalactosyldiacylglycerol 1	0.552084	-0.366544	At1G19800
TGD2	GRMZM2G138995	Trigalactosyldiacylglycerol 2	0.576586	0.2842	At3G20320
TGD2	GRMZM2G156630	Trigalactosyldiacylglycerol 2	1.08319	0.772382	At3G20320
TGD4	GRMZM2G351620	Trigalactosyldiacylglycerol 4	2.36119	/	At3G06960
TGD4	EF517601.1_FG015	Trigalactosyldiacylglycerol 4	-0.0287034	0.00551637	At3G06960
ABCG15	GRMZM2G308860	ATP-Binding Cassette G15	2.50003	5.72024	At3G21090
ABCG16	GRMZM2G143756	ATP-Binding Cassette G16	1.34271	0.195647	At3G55090
ABCG23	GRMZM2G036940	ATP-Binding Cassette G23	1.14787	-0.785729	At5G19410
ABCG26	GRMZM2G076526	ATP-Binding Cassette G26	-0.880636	-2.17807	At3G13220
ABCG28	GRMZM2G064603	ATP-Binding Cassette G28	-0.482747	-1.08185	At5G60740
ABCG28	GRMZM2G430675	ATP-Binding Cassette G28	0.857636	1.27812	At5G60740
ACBP5	GRMZM2G085547	Acyl-CoA Binding Protein 5	-0.133277	-0.226899	At5G27630
ACBP5	GRMZM2G326195	Acyl-CoA Binding Protein 5	-0.124993	-0.324123	At5G27630
LACS3	GRMZM2G152127	Long-Chain Acyl-Coenzyme A Synthetase	1.66805	2.6059	At1G64400
Transcription Factors
WRI	GRMZM2G174834	WRINKLED 1	0.803824	-4.29229	At3G54320
Val 2	GRMZM2G172621	Transcriptional factor B3	0.0775544	-0.551935	At4G32010
Val 2	GRMZM2G008356	Transcriptional factor B3	0.546314	-0.505342	At4G32010
Val 2	GRMZM2G158162	Transcriptional factor B3	0.765341	0.600416	At4G32010
bZIP	GRMZM2G448607	basic leucine Zipper Proteins	1.05881	2.10557	At3G62420
DOF	GRMZM2G456452	DNA Binding with One Finger	4.26598	3.98177	At4G00940
PKL	GRMZM2G409865	PICKLE	0.380286	0.779872	At2G25170
ARF19	GRMZM2G102845	Auxin-Responsive Factor 19	1.51497	1.14498	At1G19220
ARF19	GRMZM2G317900	Auxin-Responsive Factor 19	1.60467	0.74397	At1G19220
MYB16	GRMZM2G079123	MYB Domain Protein 16	-1.33165	-1.33165	At5G15310
MYB30	AC165178.2_FG004	MYB Domain Protein 30	-0.769323	-1.69428	At3G28910
MYB30	GRMZM2G131937	MYB Domain Protein 30	1.59113	/	At3G28910
MYB94	GRMZM2G098179	MYB Domain Protein 94	1.49219	0.90039	At3G47600
MYB96	GRMZM2G139284	MYB Domain Protein 96	-0.717697	-1.47486	At5G62470
